# Supplementary material for: Biocatalyzed Synthesis of Flavor Esters and Polyesters: A Design of Experiments (DoE) Approach
Source: MDPI journal article supplement (doi:10.3390/ijms22168493), 2021-08-06
Supplement: s1 [file s1]

## Electronic Supplementary Information

Biocatalyzed synthesis of flavor esters and polyesters using hydrolytic enzymes: a design of experiments (DoE) approach

Filippo Fabbri<sup>1</sup>, Federico A. Bertolini<sup>1</sup>, Georg M. Guebitz<sup>1,2</sup>, Alessandro Pellis<sup>1,\*</sup>

<sup>1</sup> University of Natural Resources and Life Sciences, Vienna, Department of Agrobiotechnology, Institute of Environmental Biotechnology, Konrad Lorenz Strasse 20, 3430, Tulln an der Donau, Austria

<sup>2</sup> Austrian Centre of Industrial Biotechnology, Konrad Lorenz Strasse 20, 3430, Tulln an der Donau, Austria

\*Correspondence: [alessandro.pellis@boku.ac.at](mailto:alessandro.pellis@boku.ac.at)

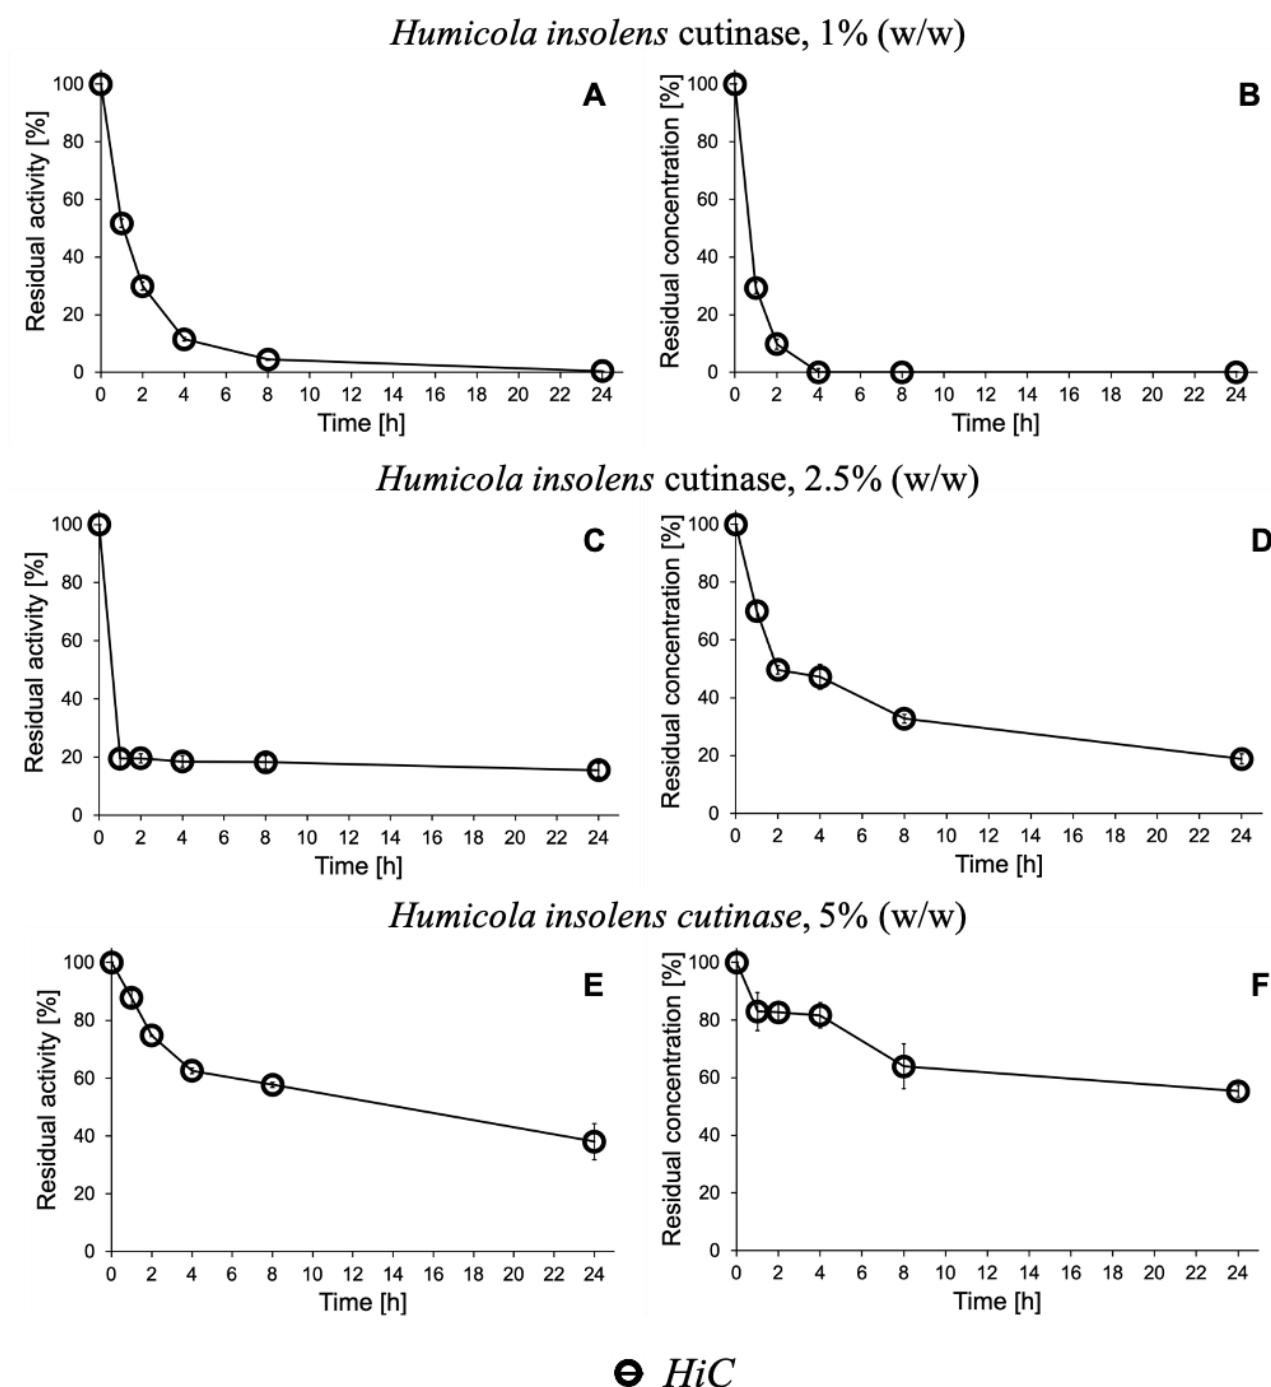

**Figure S1.** Immobilizations of *Humicola insolens* cutinase (HiC) onto Accurell MP 1000 (polypropylene) beads in 0.1 M  $\text{Na}_2\text{HPO}_4/\text{NaH}_2\text{PO}_4$  buffer at pH 8 with different enzymes concentrations. Remaining para-nitrophenyl butyrate activity (A, C and E) and protein concentration (B, D and F) of the supernatant for HiC concentrations of 1% (A and B), 2.5% (C and D) and 5% (E and F). The figure shows the mean  $\pm$  SD.

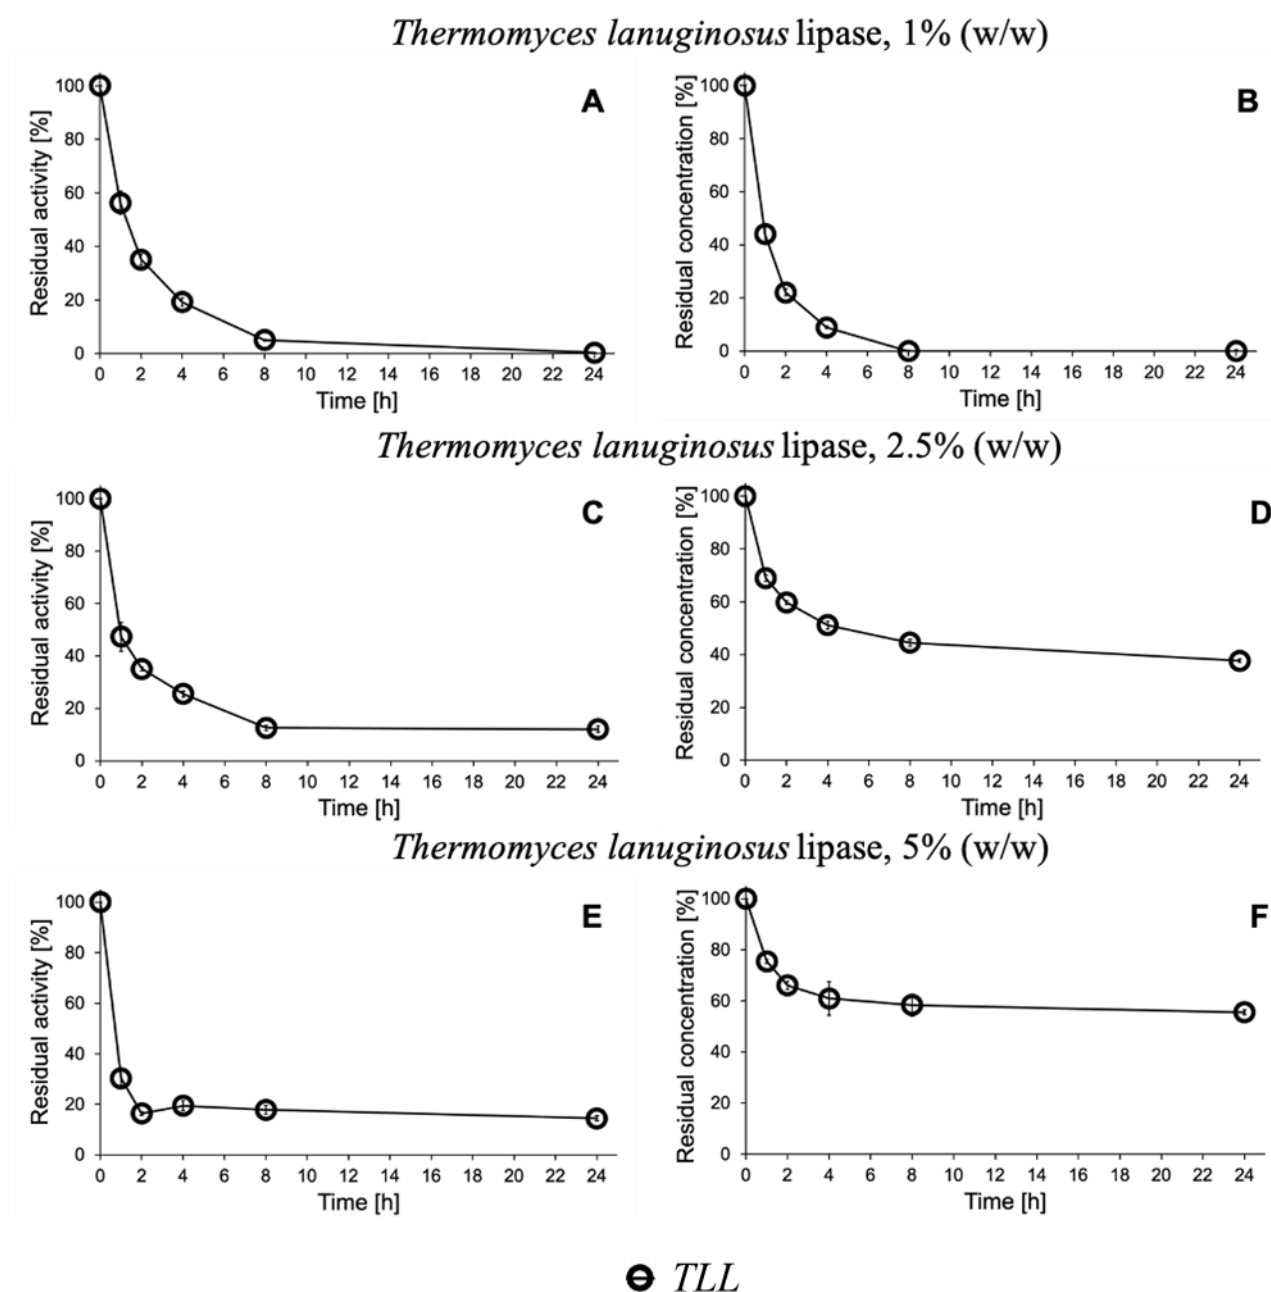

**Figure S2.** Immobilizations of *Thermomyces lanuginosus* lipase (TLL) onto Accurell MP 1000 (polypropylene) beads in 0.1 M  $\text{Na}_2\text{HPO}_4/\text{NaH}_2\text{PO}_4$  buffer at pH 8 with different enzymes concentrations. Remaining para-nitrophenyl butyrate activity (A, C and E) and protein concentration (B, D and F) of the supernatant for TLL concentrations of 1% (A and B), 2.5% (C and D) and 5% (E and F). The figure shows the mean  $\pm$  SD.

*Thermobifida cellulosilytica* cutinase 1, 1% (w/w)

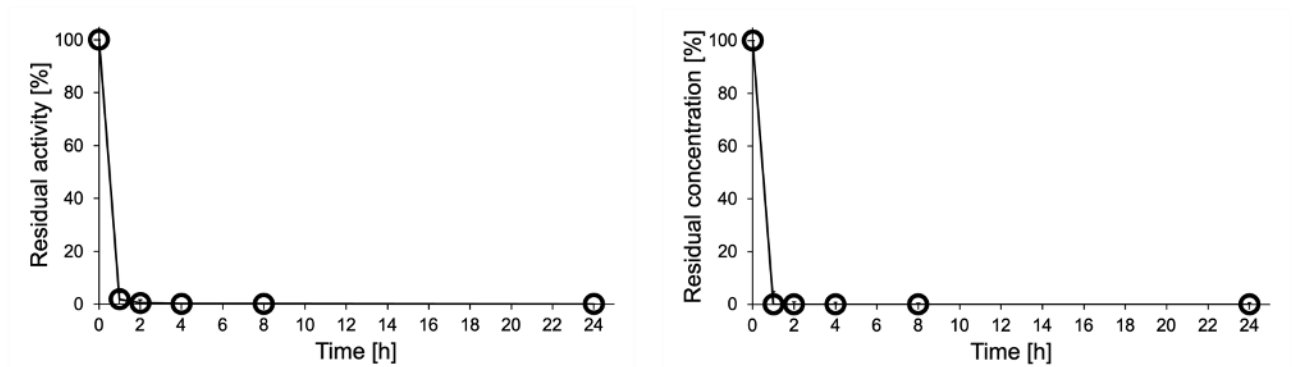

● Thc\_Cut1

*Thermobifida cellulosilytica* cutinase 2, 1% (w/w)

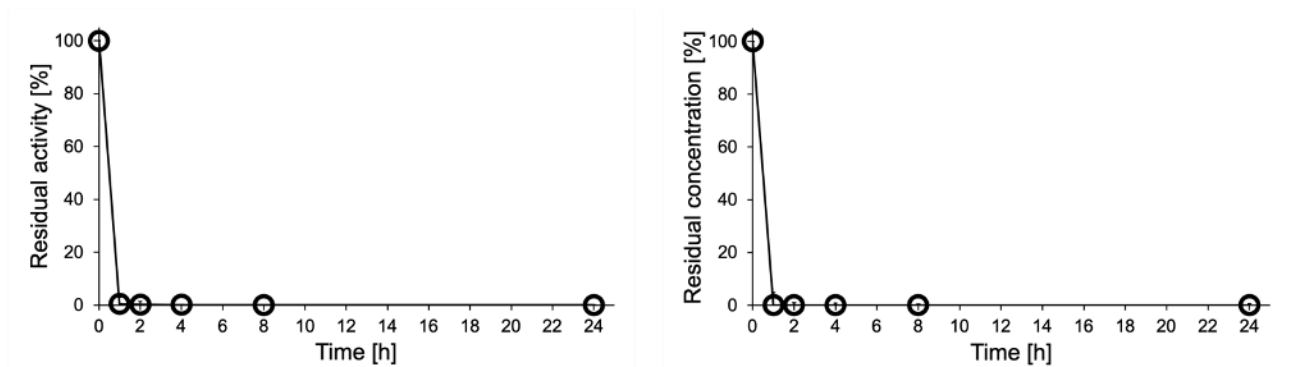

● Thc\_Cut2

**Figure S3.** Immobilizations of Thc\_Cut1 (above) and Thc\_Cut2 (below) onto Accurell MP 1000 (polypropylene) beads in 0.1 M  $\text{Na}_2\text{HPO}_4/\text{NaH}_2\text{PO}_4$  buffer at pH 8 with enzymes concentrations 1% (w/w), remaining para-nitrophenyl butyrate activity (on the left) and protein concentration (on the right) in the supernatant. The figure shows the mean  $\pm$  SD.

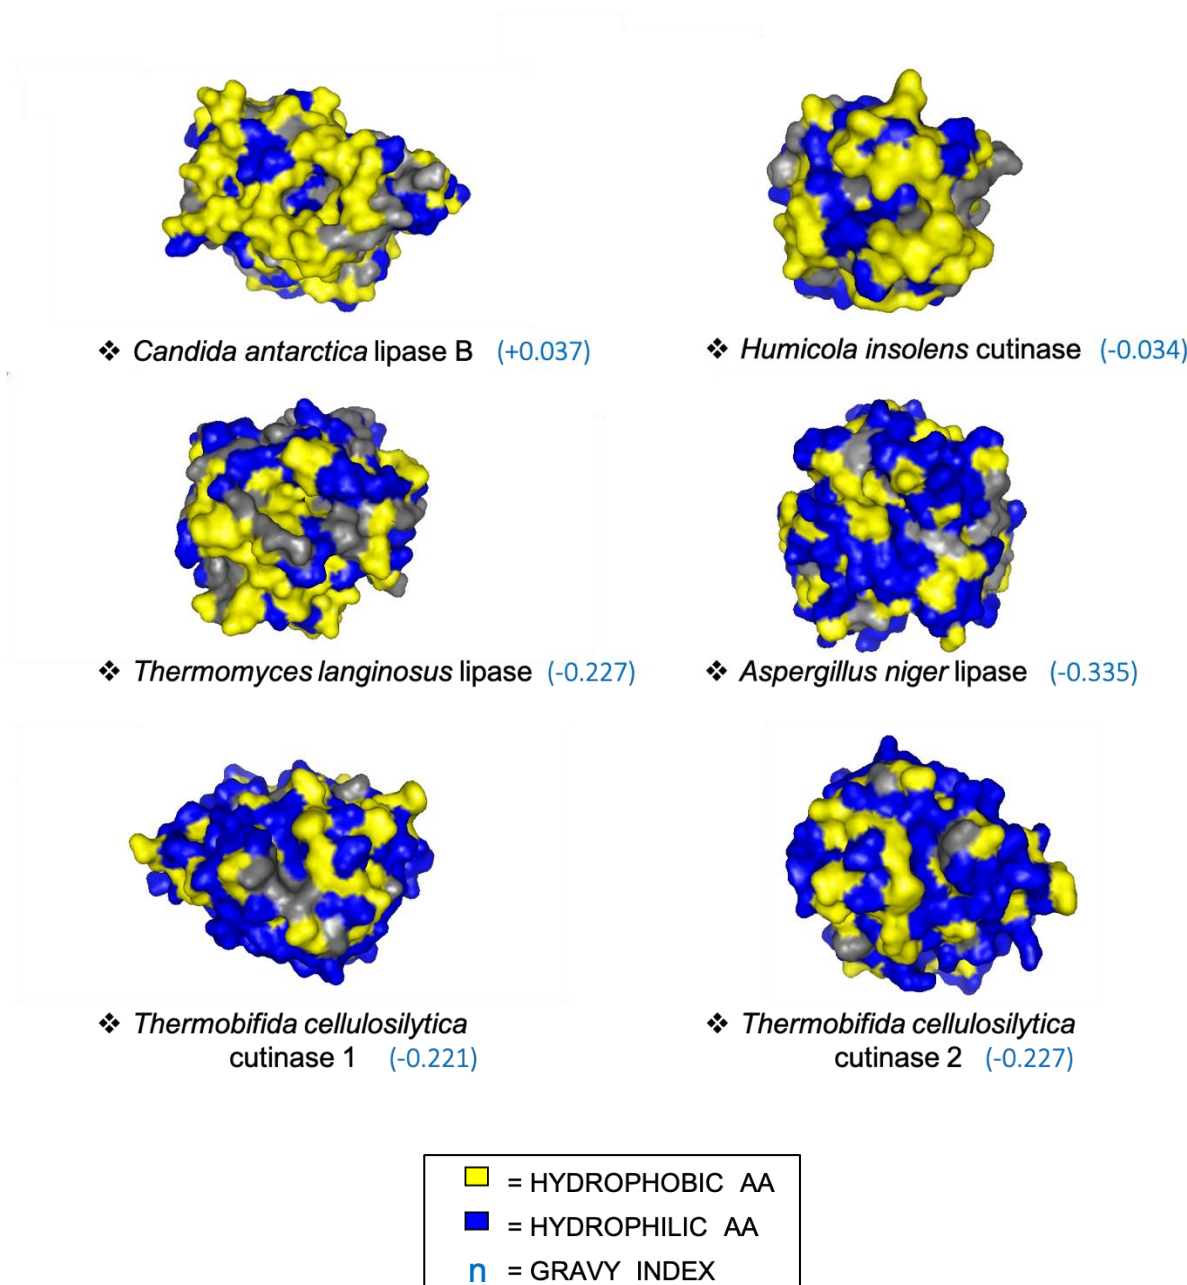

**Figure S4.** Gravy index calculations of different hydrolytic enzymes to verify if the rate of immobilization onto polypropylene beads (hydrophobic support) was proportional to the hydrophobicity of the enzymes. Higher the number of the gravity index, higher the hydrophobicity. Pictures were taken using Pymol while Gravy index was calculated using PDB (Protein DataBank) tools. PDB code for enzymes: CaLB (1tca), HiC (4oyy), AnL (1uwc), TLL (1du4), Thc\_Cut 1 (5lui), Thc\_Cut 2(5luj).

**Table S1.** The reactions involved in the full factorial design. Coefficient shown are temperature (50 °C, 70 °C and 90 °C), alcohol length (C<sub>4</sub>, C<sub>8</sub> and C<sub>12</sub>) and acid length (C<sub>4</sub>, C<sub>8</sub> and C<sub>12</sub>). Time points were withdrawn at different time (2, 4 and 6 hours). The last three reactions represent the central point of the DoE.

| Reaction no° | Temperature<br>[°C] | Acid length<br>[C no°] | Alcohol<br>length<br>[C no°] |
|--------------|---------------------|------------------------|------------------------------|
| 1            | 50                  | 4                      | 4                            |
| 2            | 70                  | 4                      | 4                            |
| 3            | 90                  | 4                      | 4                            |
| 4            | 50                  | 8                      | 4                            |
| 5            | 70                  | 8                      | 4                            |
| 6            | 90                  | 8                      | 4                            |
| 7            | 50                  | 12                     | 4                            |
| 8            | 70                  | 12                     | 4                            |
| 9            | 90                  | 12                     | 4                            |
| 10           | 50                  | 4                      | 8                            |
| 11           | 70                  | 4                      | 8                            |
| 12           | 90                  | 4                      | 8                            |
| 13           | 50                  | 8                      | 8                            |
| 14           | 70                  | 8                      | 8                            |
| 15           | 90                  | 8                      | 8                            |
| 16           | 50                  | 12                     | 8                            |
| 17           | 70                  | 12                     | 8                            |
| 18           | 90                  | 12                     | 8                            |
| 19           | 50                  | 4                      | 12                           |
| 20           | 70                  | 4                      | 12                           |
| 21           | 90                  | 4                      | 12                           |
| 22           | 50                  | 8                      | 12                           |
| 23           | 70                  | 8                      | 12                           |
| 24           | 90                  | 8                      | 12                           |
| 25           | 50                  | 12                     | 12                           |
| 26           | 70                  | 12                     | 12                           |
| 27           | 90                  | 12                     | 12                           |
| 28           | 70                  | 8                      | 8                            |
| 29           | 70                  | 8                      | 8                            |
| 30           | 70                  | 8                      | 8                            |

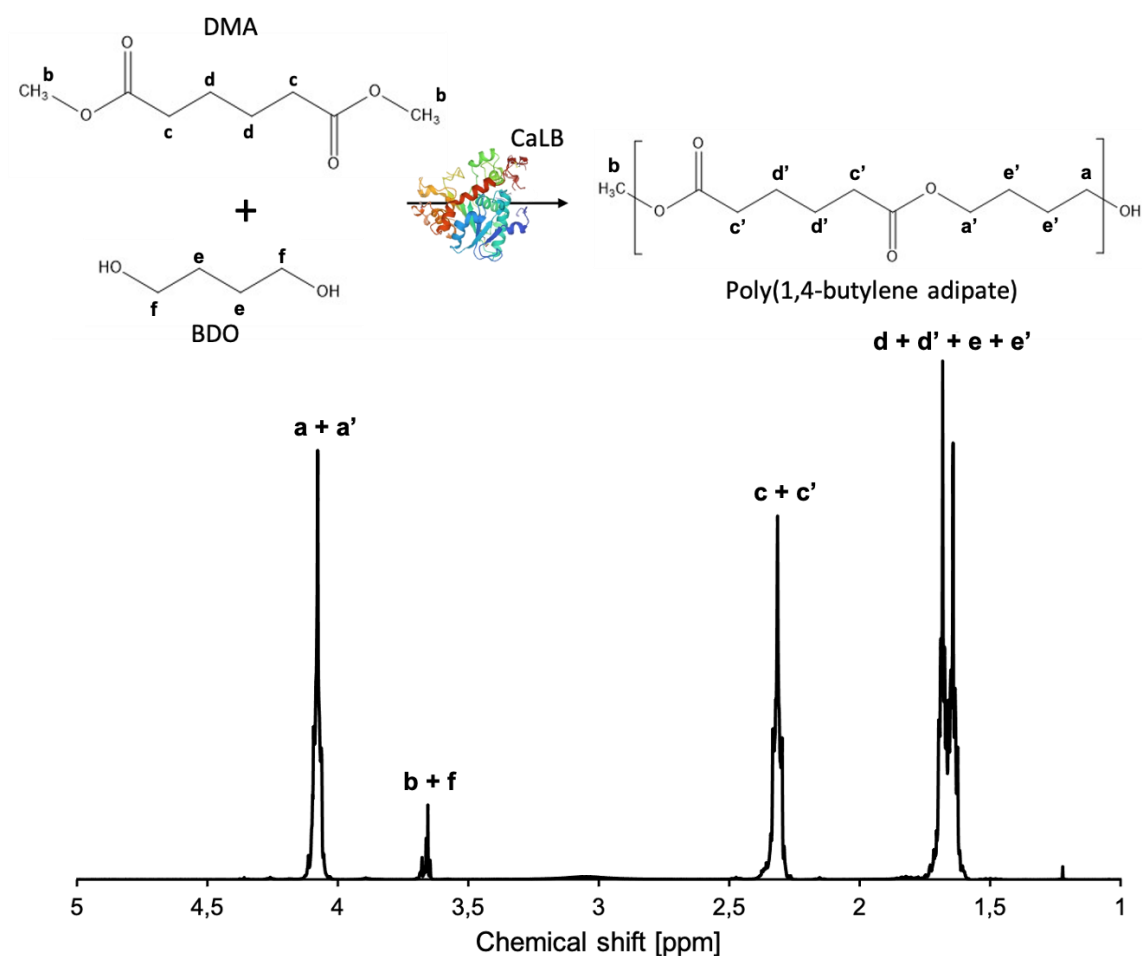

**Figure S5.** Detail of the <sup>1</sup>H-NMR spectrum of poly(1,4-butylene adipate) synthesized using immobilized CaLB starting from dimethyl adipate and 1,4-butanediol. Spectrum was recorded using CDCl<sub>3</sub> as solvent.

**Table S2.** Polycondensation of DMA with 1,4-BDO and 1,8-ODO catalysed by 10% (w/w) of different immobilized enzymes at their T<sub>OPTIMUM</sub> after 24h reaction.

| Diol           | Imm. enzyme | Temp. | M <sub>n</sub> <sup>a</sup> | M <sub>w</sub> <sup>a</sup> | Đ <sup>a</sup> | M <sub>0</sub> | DP <sup>c</sup> | Conv. [%] <sup>b</sup> |
|----------------|-------------|-------|-----------------------------|-----------------------------|----------------|----------------|-----------------|------------------------|
| 1,4-butanediol | CaLB L4777  | 85°C  | 4300                        | 14400                       | 3.36           | 200.2          | 21.5            | 93                     |
| 1,4-butanediol | CaLB        | 85°C  | 7500                        | 19500                       | 2.58           |                | 37.4            | 96                     |
| 1,4-butanediol | CaLB        | 70°C  | 5700                        | 11400                       | 2.01           |                | 28.5            | 96                     |
| 1,4-butanediol | CaLB        | 50°C  | 1800                        | 4800                        | 2.66           |                | 9.0             | 92                     |
| 1,4-butanediol | HiC         | 85°C  | 800                         | 900                         | 1.12           |                | 4.0             | 7                      |
| 1,4-butanediol | HiC         | 70°C  | 700                         | 700                         | 1.03           |                | 3.5             | 56                     |
| 1,4-butanediol | HiC         | 50°C  | 200                         | 400                         | 1.71           |                | 1.0             | 52                     |
| 1,4-butanediol | Thc_Cut1    | 85°C  | 200                         | 300                         | 1.53           |                | 1.0             | 27                     |

|                |            |      |      |       |      |       |      |
|----------------|------------|------|------|-------|------|-------|------|
| 1,4-butanediol | Thc_Cut1   | 70°C | 200  | 300   | 1.59 | 1.0   | 54   |
| 1,4-butanediol | Thc_Cut1   | 50°C | 200  | 400   | 1.96 | 1.0   | 63   |
| 1,8-octanediol | CaLB L4777 | 85°C | 5000 | 22200 | 4.45 | 256.3 | 19.5 |
| 1,8-octanediol | CaLB       | 85°C | 8100 | 22200 | 2.73 | 31.6  | 97   |
| 1,8-octanediol | CaLB       | 70°C | 7000 | 16700 | 2.38 | 27.3  | 96   |
| 1,8-octanediol | HiC        | 85°C | 800  | 800   | 1.10 | 3.1   | 31   |
| 1,8-octanediol | HiC        | 70°C | 1400 | 2000  | 1.42 | 5.5   | 86   |

<sup>a</sup>Calculated via GPC calibrated with low molecular weight polystyrene standards 250-70 000 Da.

<sup>b</sup>Calculated via <sup>1</sup>H-NMR by comparing the ration between the signal methylene groups adjacent to -OH of BDO and the methylene groups of DMSe (assumed as constant).

<sup>c</sup>Degree of polymerization (DP) =  $M_n$ /molecular weight of the repeating unit ( $M_0$ ).

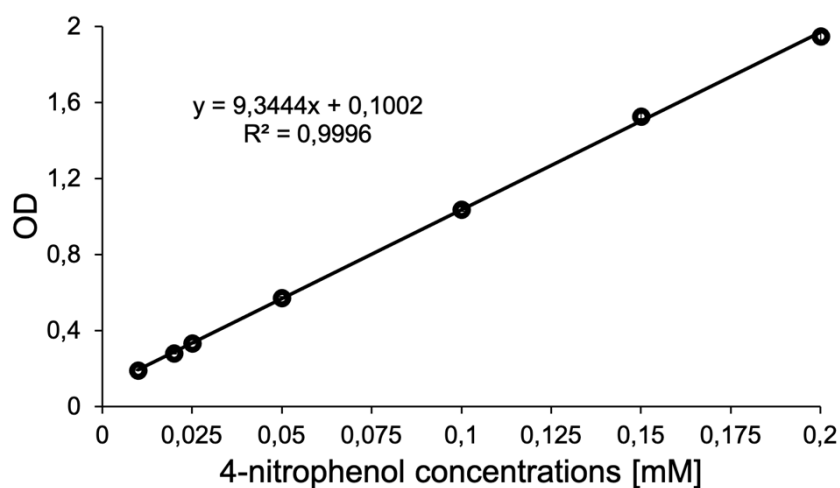

**Figure S6.** Determination of the extinction coefficient of 4-nitrophenol in 0.1 M Na<sub>2</sub>HPO<sub>4</sub>/NaH<sub>2</sub>PO<sub>4</sub> buffer at pH 8.0. The figure shows the mean  $\pm$  SD.

| <b>Table S3.</b> Gas chromatography (GC-FID) parameters |        |         |          |          |
|---------------------------------------------------------|--------|---------|----------|----------|
| GC                                                      | C°/min | Next C° | Hold min | Run time |
| Initial                                                 |        | 50      | 5.00     | 5.00     |
| Ramp 1                                                  | 5.00   | 230     | 2.00     | 43.00    |
| Ramp 2                                                  | 25.00  | 250     | 2.00     | 45.80    |
| Post-run                                                |        | 50      | 0.00     | 45.80    |



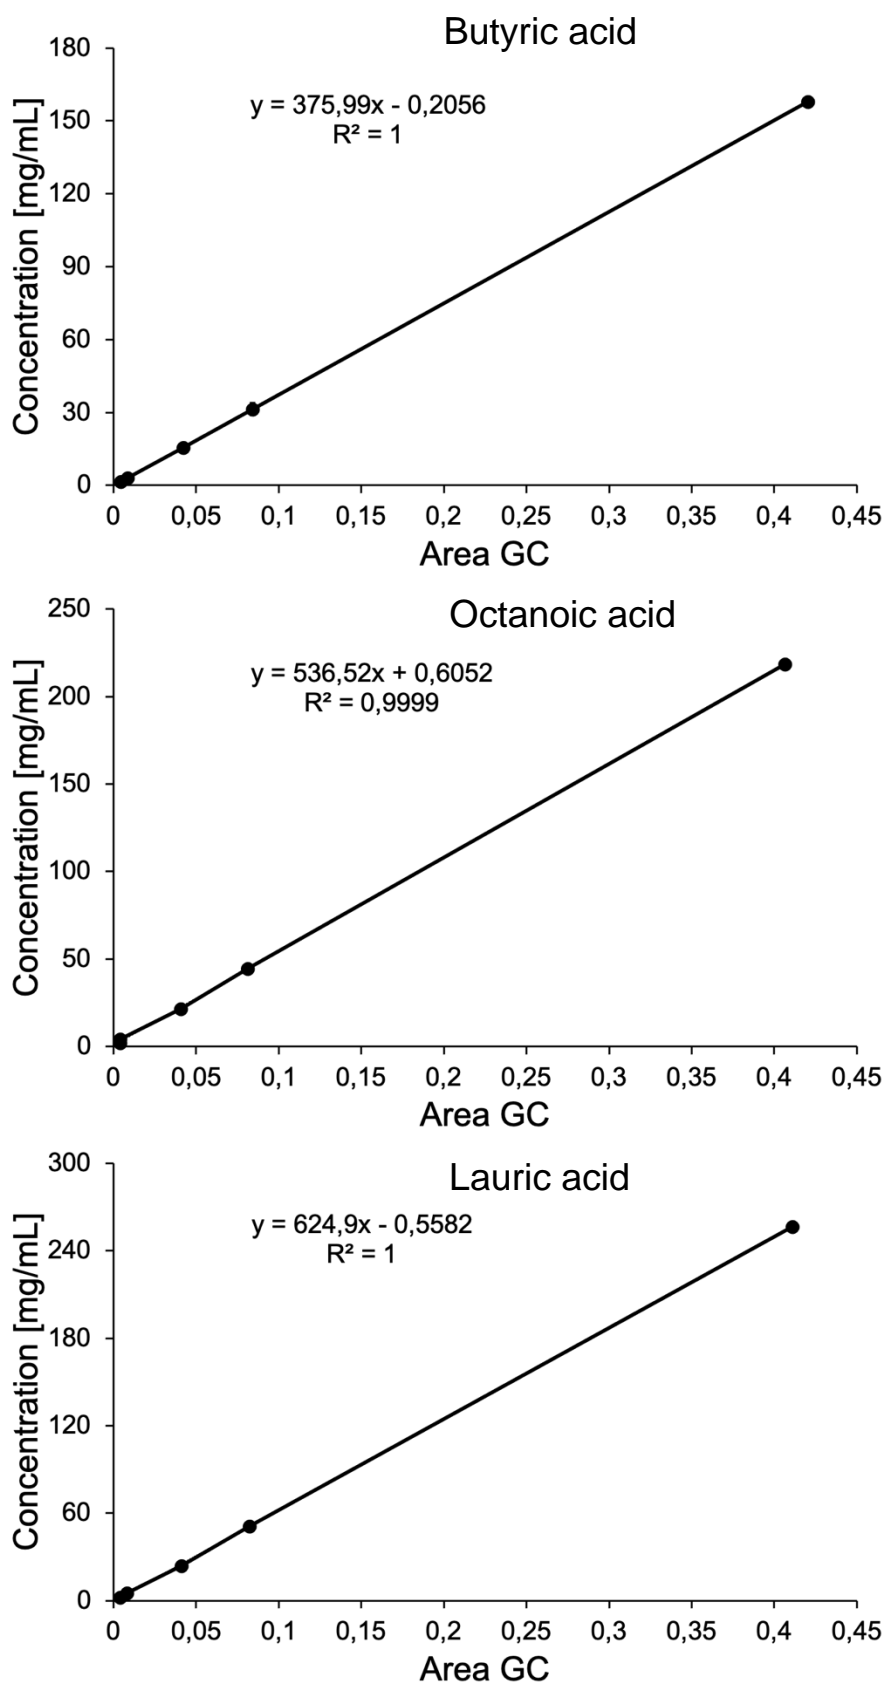

**Figure S7.** Gas chromatography (GC-FID) calibration curves for butyric acid, octanoic acid and lauric acid.
